# Supplementary material
Source: JCI journal article supplement (doi:10.1172/jci195254)
Supplement: sd1 [file 1]

## 1 **Supplemental Methods**

### 2 **Human subjects**

3 Self-identified Black and Hispanic women, aged 23-41 years, with regular, ovulatory  
4 menstrual cycles and at least one prior pregnancy were prospectively enrolled between  
5 November 2020 and December 2022. Study participants were consented for the review  
6 of their medical records and collection of blood and endometrial samples. Women with  
7 endocrine or autoimmune disorders, including antiphospholipid syndrome and polycystic  
8 ovary syndrome, or anatomic disorders of the reproductive tract, including hydrosalpinges  
9 or submucosal fibroids, were excluded. Women with a history of pregnancy  
10 complications, including recurrent pregnancy loss, preeclampsia or fetal growth restriction  
11 were also excluded. The demographic characteristics of participants are presented in

### 12 **Table S1.**

### 13 **Sample collection and processing**

14 For the collection of endometrial tissue samples, study participants reported that they  
15 were not actively trying to conceive and had not used hormonal treatment in the 3 months  
16 prior to recruitment. Once enrolled, study participants were instructed to use condoms  
17 during sexual intercourse for the duration of their enrollment. Endometrial biopsies were  
18 performed with the Endocell®, a disposable endometrial tissue sampler (Wallach Surgical  
19 Devices, Trumbull, CT, USA) in the proliferative phase between cycle days 10-13 (n = 6)  
20 and during the early (n = 10), mid (n = 8), or late (n = 3) secretory phases, timed based  
21 on the urinary LH surge (early secretory = LH + 1-2 days, mid-secretory = LH + 8-9 days,  
22 late secretory = LH + 12-13 days). On the day of the endometrial biopsy, blood (5 mL)  
23 was collected in nonheparinized, serum separator tubes, allowed to clot, and centrifuged

24 at 4C. Serum estradiol (E2) and progesterone (P4) levels were determined (LabCorp,  
25 Raritan, NJ). Correct timing of biopsies was confirmed with serum E2 and P4 levels and  
26 endometrial histopathology as determined by two gynecological pathologists who were  
27 blinded to the timing of the tissue collection (1).

28 For collection of endometrial deciduae, women scheduled for an elective  
29 termination of an uncomplicated pregnancy in the first trimester at 6-8 weeks gestation  
30 were eligible for inclusion. Study participants (n = 3) were recruited and enrolled prior to  
31 their scheduled surgical procedure. After dilation and curettage, tissue samples were  
32 floated in phosphate buffered saline (PBS, pH 7.2) and the endometrial decidua was  
33 isolated from the gestational sac and chorionic villi by mechanical separation using  
34 forceps.

35 After collection, endometrial tissue was placed in a tissue culture dish and rinsed  
36 with ice-cold PBS to remove blood and mucus. Using fine forceps, each sample was  
37 separated such that approximately 100 mg endometrial tissue was fixed in formalin and  
38 stored at room temperature for immunohistology; approximately 100 mg was preserved  
39 in RNAprotect (Qiagen, #76160) and stored at -80°C for RNA extraction for bulk RNA  
40 sequencing; and the remaining tissue was placed on ice, minced and processed within  
41 one hour of collection for scRNA-Seq.

#### 42 **Isolation of endometrial and decidual cells**

43 Cells were isolated from minced endometrial tissues for scRNA-Seq by incubation at 37°C  
44 in digestion media (DMEM/F12, 3% charcoal-stripped fetal bovine serum (FBS), 1 mg/mL  
45 collagenase A (Roche, #11088793001), 0.1 mg/mL DNase type I (Roche, #10104159001)  
46 with agitation on a benchtop shaker at 250 rpm for 15 minutes. The tissue was then further

47 dissociated by repeatedly passing it through a 16G needle attached to a 10 mL syringe.  
48 The shaking and needle passage steps were repeated once more to ensure thorough  
49 dissociation. The cell suspension was centrifuged at  $300\times g$  for 5 minutes. The resulting  
50 pellet was resuspended in 1 mL of TrypLE Select Enzyme (Thermo Fisher #12563011)  
51 containing 0.1 mg/mL DNase I and incubated at 37°C on a shaker at 250 rpm for 15  
52 minutes. 10 mL of ice-cold digestion media was added, and the cell suspension was  
53 filtered through a 40  $\mu\text{m}$  cell strainer. Red blood cells (RBC) were lysed using RBC lysis  
54 buffer (ThermoFisher, #00-4333-57) and dead cells were removed using the Dead Cell  
55 Removal Kit (Miltenyi Biotec, #130-090-101). The resulting single-cell suspension was  
56 used for Chromium (10X Genomics) sequencing.

#### 57 **RNA isolation, library preparation, and sequencing**

58 Total RNA was isolated from endometrial tissue using a RNeasy mini kit (Qiagen,  
59 #74136). RNA was quantified by Qubit (Invitrogen) and quality was assessed with a  
60 Fragment Analyzer (Advanced Analytical Technologies, Inc.) at Albert Einstein College of  
61 Medicine Epigenomics Shared Facility (RRID:SCR\_023284). Libraries were prepared  
62 using the KAPA Stranded RNA-Seq Kit with RiboErase for Illumina Platforms  
63 (Kapa Biosystems #KK8483) with the addition of Ambion External RNA Controls  
64 Consortium (ERCC) spike-in controls (Invitrogen #4456740). Libraries were quantified,  
65 multiplexed, and sequenced as single end (1 x 75 bp) on an Illumina NextSeq 500  
66 instrument (RRID:SCR\_014983) to yield approximately 50 million reads per sample.  
67 FASTQ files were generated using picard (v2.26.10, RRID:SCR\_006525) module  
68 ExtractIlluminaBarcodes followed by IlluminaBasecallsToFastq with default parameters,  
69 except "INCLUDE\_NON\_PF\_READS = false". Raw FASTQ files were trimmed of flanking

70 adapter sequences using Trim Galore (v0.6.7, RRID:SCR\_011847)(2) with default  
71 parameters and “adapter = AGATCGGAAGAGC”. Read quality was assessed using  
72 FastQC (v0.11.9, RRID:SCR\_014583) and FastQ Screen (v0.6.5, RRID:SCR\_000141).

73 For scRNA-Seq, libraries were generated and sequenced using the 10X Chromium  
74 Single Cell 3' GEM kit (10X Genomics, v2). Paired end, 2 x 75 bp, sequencing was  
75 performed on an Illumina NextSeq 500 instrument (RRID:SCR\_014983). Output was  
76 demultiplexed and converted to FASTQ format with Cell Ranger (10X Genomics, v3.1.0).

### 77 **RNA sequencing analysis**

78 Trimmed reads were mapped to Homo sapiens genome assembly GRCh38 (hg38) using  
79 STAR (v2.7.9a, RRID:SCR\_004463)(3). Reads overlapping Ensembl (4) annotations  
80 (v110) were quantified with STAR prior to model-based differential expression analysis  
81 using the edgeR-robust method (5-7). A read counts matrix was used as input for the  
82 endest (8) R package (v0.1.1) results were visualized with ggplot2 (v3.5.1,  
83 RRID:SCR\_014601). For differential expression analysis, genes with low counts per  
84 million (CPM) were removed using the filterByExpr function from edgeR  
85 (RRID:SCR\_012802). Genes were considered differentially expressed if the FDR-  
86 corrected p-values were less than 0.05. Venn diagrams were generated with the R  
87 package eulerr (v7.0.2, RRID:SCR\_022753).

88 For scRNA-Seq, demultiplexed sequencing reads were processed and aligned to  
89 the *Homo sapiens* genome assembly GRCh38 (hg38) using STAR (v2.7.9a) with 10X  
90 Genomics Cell Ranger (v3.1.0, RRID:SCR\_017344). Samples were merged using the  
91 integration anchors function of the Seurat package (v5.1.0, RRID:SCR\_016341) in R (9).  
92 Genes expressed in fewer than three cells in a sample were excluded, as well as cells

93 that expressed fewer than 200 genes and mitochondrial gene content >5% of the total  
94 unique molecular identifier count. Data were normalized using a global-scaling  
95 normalization method (9) that normalizes the feature expression measurements for each  
96 cell by the total expression, multiplies this by a scale factor (10,000), and then log-  
97 transforms the results. High *HLA-G* and *CGA* cells were identified in pregnant biopsies  
98 as trophoblast were removed from our analysis. The top 2,000 most variable genes that  
99 were used for cell clustering were found using the *FindVariableFeatures* function and  
100 were then normalized using the *ScaleData* function. Based on an elbow plot generated  
101 using the *Elbowplot* function of Seurat, we selected 20 principal components (PC) for  
102 downstream analyses. Cell clusters were generated using *FindNeighbors* and  
103 *FindClusters* functions. For visualization, UMAPs were generated using the *RunUMAP*,  
104 *FeaturePlot* and *DimPlot* functions. The *DotPlot* Seurat function was used to generate dot  
105 plots to visualize gene expression for each assigned cluster. The Seurat function  
106 *AddModuleScore* was used to calculate ERA and decidualization scores. Ligand-receptor  
107 cellular communication analysis was determined with the CellChat (v2.1.2,  
108 RRID:SCR\_021946) (10, 11) R package. Briefly, communication probabilities were  
109 calculated between cell types using the functions *identifyOverExpressedGenes* and  
110 *identifyOverExpressedInteractions*. Signaling sources, influencers, targets, mediators,  
111 and high-order information were obtained by communication network analysis. The  
112 resulting interactions were visualized using the included plotting functions.

### 113 **Glandular Epithelium Receptivity Module (GERM) score calculation**

114 The receptivity module signature genes (n = 556, Table S7) were separated by positive  
115 or negative fold change and described as “GERM\_up” or “GERM\_down”, respectively,

116 where “GERM\_up” genes were increased at mid-secretory phase. The resulting  
117 dataframe was used as input for *fgsea* (12) enrichment analysis implementation in  
118 clusterProfiler (v4.12.6, RRID:SCR\_016884) (13) with multiple datasets. Microarray and  
119 bulk RNA-Seq experiment results were downloaded from NCBI GEO  
120 (RRID:SCR\_005012), using the GEO2R tool, as a list of genes and fold changes for early  
121 versus mid-secretory endometrium. Human endometrial epithelial organoid culture data  
122 (14) were not available for evaluation with GEO2R; therefore, raw read counts were  
123 downloaded from GEO and analyzed with DESeq2 (v1.48.2, RRID:SCR\_015687) (15)  
124 using the same parameters. Spatial and scRNA-Seq datasets were subset for the  
125 glandular or secretory glandular epithelium cell types. A combined normalized enrichment  
126 score (NES) was calculated as  $GERM\ score = GERM\_up + -1(GERM\_down)$  and  
127 adjusted p-values were combined using the metap package with the *sumlog* function. The  
128 results were compiled and then visualized as a dotplot with ggplot2 (v3.5.1,  
129 RRID:SCR\_014601).

### 130 **Immunostaining and Imaging**

131 Formalin-fixed and paraffin-embedded endometrial tissue was sectioned at 5 mm, placed  
132 on charged glass slides (StatLab, Millenia 1000), air-dried and stored at room  
133 temperature before use. Sections were stained with hematoxylin and eosin (H&E) or  
134 immunohistochemistry (IHC) staining. For IHC, sections were deparaffinized followed by  
135 antigen retrieval with BOND Epitope Retrieval Solution 2 (Leica Biosystems, USA) for 40  
136 minutes. Primary antibodies to detect the estrogen receptor alpha (clone 6F11, Leica  
137 Biosystems) and progesterone receptor (clone 16, Leica Biosystems) were applied for 20  
138 and 24 minutes, respectively. Bound primary antibodies were detected with BOND

139 Polymer Refine Detection kit. Sections were washed with distilled water, counterstained  
140 with hematoxylin, dehydrated through graded alcohols, cleared in xylene, and mounted  
141 with synthetic permanent media.

142

## 143 References

- 144 1. Chemerinski A, Shen M, Valero-Pacheco N, Zhao Q, Murphy T, George L, et al. The impact  
145 of ovarian stimulation on the human endometrial microenvironment. *Hum Reprod.*  
146 2024;39(5):1023-41.
- 147 2. Martin M. Cutadapt removes adapter sequences from high-throughput sequencing reads.  
148 *EMBnetjournal.* 2011;17(1):pp-10.
- 149 3. Dobin A, Davis CA, Schlesinger F, Drenkow J, Zaleski C, Jha S, et al. STAR: ultrafast  
150 universal RNA-seq aligner. *Bioinformatics.* 2013;29(1):15-21.
- 151 4. Aken BL, Ayling S, Barrell D, Clarke L, Curwen V, Fairley S, et al. The Ensembl gene  
152 annotation system. *Database (Oxford).* 2016;2016:1-19.
- 153 5. Robinson MD, McCarthy DJ, and Smyth GK. edgeR: a Bioconductor package for  
154 differential expression analysis of digital gene expression data. *Bioinformatics.*  
155 2010;26(1):139-40.
- 156 6. McCarthy DJ, Chen Y, and Smyth GK. Differential expression analysis of multifactor RNA-  
157 Seq experiments with respect to biological variation. *Nucleic Acids Res.*  
158 2012;40(10):4288-97.
- 159 7. Zhou X, Lindsay H, and Robinson MD. Robustly detecting differential expression in RNA  
160 sequencing data using observation weights. *Nucleic Acids Res.* 2014;42(11):e91.
- 161 8. Agarwal V, Bell GW, Nam JW, and Bartel DP. Predicting effective microRNA target sites in  
162 mammalian mRNAs. *Elife.* 2015;4:e05005.
- 163 9. Hao Y, Hao S, Andersen-Nissen E, Mauck WM, 3rd, Zheng S, Butler A, et al. Integrated  
164 analysis of multimodal single-cell data. *Cell.* 2021;184(13):3573-87.e29.
- 165 10. Jin S, Guerrero-Juarez CF, Zhang L, Chang I, Ramos R, Kuan CH, et al. Inference and  
166 analysis of cell-cell communication using CellChat. *Nat Commun.* 2021;12(1):1088.
- 167 11. Jin S, Plikus MV, and Nie Q. CellChat for systematic analysis of cell-cell communication  
168 from single-cell transcriptomics. *Nat Protoc.* 2024.
- 169 12. Korotkevich G, Sukhov V, Budin N, Shpak B, Artyomov MN, and Sergushichev A. Fast  
170 gene set enrichment analysis. *bioRxiv.* 2021:060012.
- 171 13. Wu T, Hu E, Xu S, Chen M, Guo P, Dai Z, et al. clusterProfiler 4.0: A universal enrichment  
172 tool for interpreting omics data. *Innovation (Camb).* 2021;2(3):100141.
- 173 14. Fitzgerald HC, Dhakal P, Behura SK, Schust DJ, and Spencer TE. Self-renewing  
174 endometrial epithelial organoids of the human uterus. *Proc Natl Acad Sci U S A.*  
175 2019;116(46):23132-42.
- 176 15. Love MI, Huber W, and Anders S. Moderated estimation of fold change and dispersion for  
177 RNA-seq data with DESeq2. *Genome Biol.* 2014;15(12):550.

178

179 **Supplemental Figures**

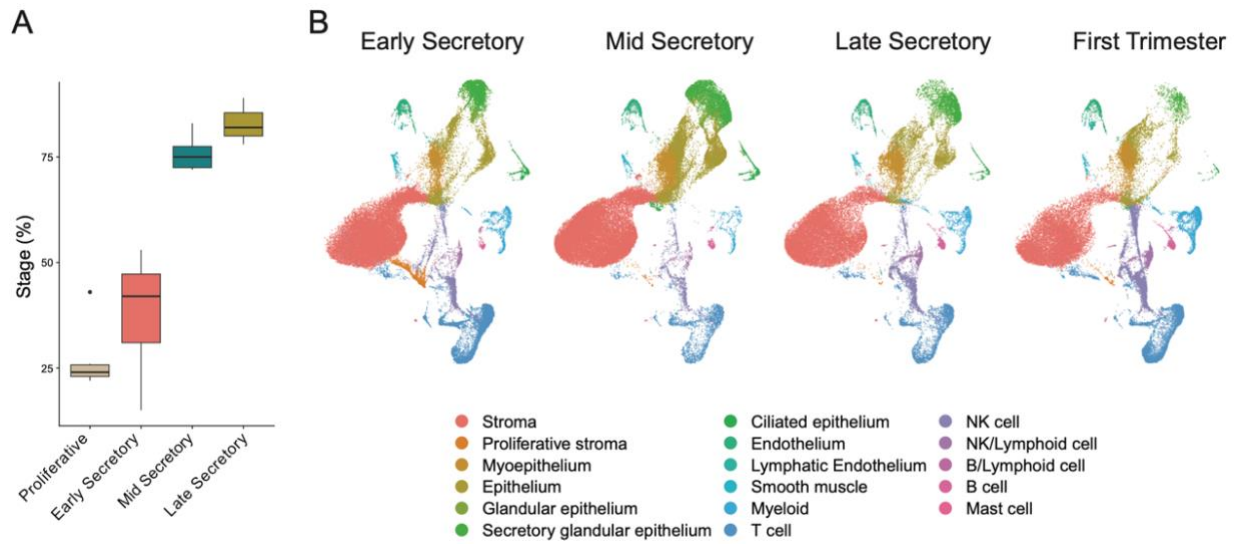

180

181 **Figure S1. Additional information related to menstrual cycle phase.** (A) Boxplot of  
182 sample staging from bulk mRNA-seq ( $n = 26$ ) using the eldest package from Teh and  
183 colleagues (33). (B) Uniform Manifold Approximation and Projection (UMAP) visualization  
184 of scRNA-Seq data from endometrial biopsies from the early ( $n = 4$ ), mid- ( $n = 4$ ), and  
185 late secretory ( $n = 3$ ) phases, and first trimester decidua samples ( $n = 3$ ).

186

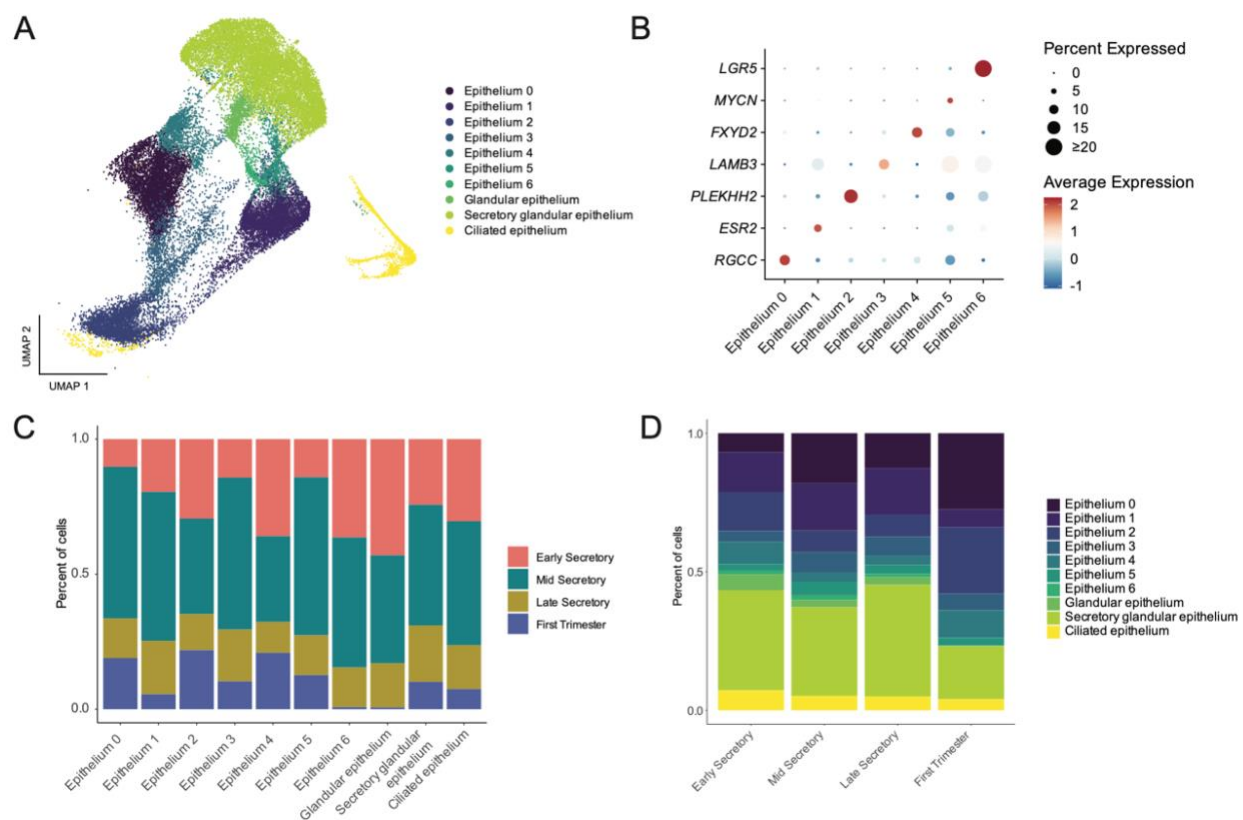

187

188 **Figure S2. Epithelium subclusters and distribution across cycle stages. (A)** UMAP

189 visualization of scRNA-Seq data from human epithelium sub-clusters. **(B)** Dot plot of

190 marker genes for each sub cluster. **(C)** Stacked bar plots showing the contribution of each

191 cycle stage to the epithelial sub-clusters and **(D)** the proportion of epithelial sub-clusters

192 split by stage.

193

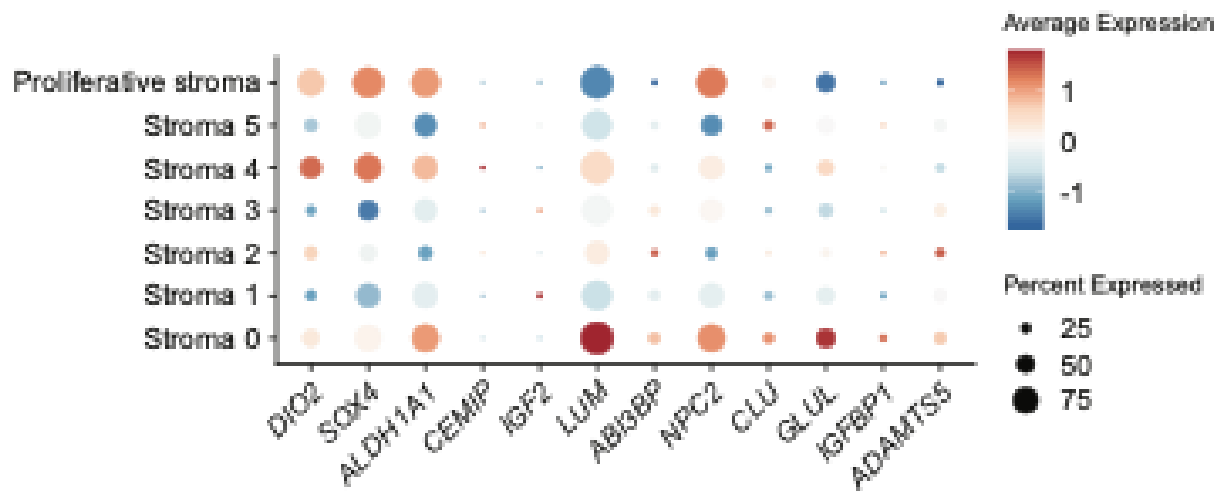

194

195 **Figure S3. Expression of in vitro senescence markers is not restricted to a specific**

196 **stroma subcluster.** Dotplot of in vitro senescence markers in the stroma sub-clusters.
